# Supplementary material for: The global health workforce stock and distribution in 2020 and 2030: a threat to equity and ‘universal’ health coverage?
Source: PubMed Central journal article supplement — BMJ Glob Health. 2022 Jun 27;7(6):e009316. doi: 10.1136/bmjgh-2022-009316 (PMC9237893; doi:10.1136/bmjgh-2022-009316), 2022-06-27
Supplement: bmjgh-2022-009316supp001.pdf [file bmjgh-2022-009316supp001.pdf]

## SUPPLEMENTARY MATERIAL

## Appendix 1. Global availability of health workforce statistics

**Table A1. Overview of statistics availability for five health workers occupations (medical doctors, nurses, midwives, dentists, pharmacists).**

| Occupation                                            | Medical doctors                | Nurses | Midwives                                                                                                                                                                                                                                                                                  | Dentists                       | Pharmacists                                                                                                                           |
|-------------------------------------------------------|--------------------------------|--------|-------------------------------------------------------------------------------------------------------------------------------------------------------------------------------------------------------------------------------------------------------------------------------------------|--------------------------------|---------------------------------------------------------------------------------------------------------------------------------------|
| Number of countries with stock data                   | 194                            | 194    | 122                                                                                                                                                                                                                                                                                       | 192                            | 187                                                                                                                                   |
| Number of countries with data in the last five years* | 171                            | 178    | 110                                                                                                                                                                                                                                                                                       | 171                            | 146                                                                                                                                   |
| Number of countries with at least 5 data points       | 163                            | 176    | 88                                                                                                                                                                                                                                                                                        | 147                            | 133                                                                                                                                   |
| Number of countries with graduates reported           | 78 (mostly European region 48) | 124    | 105                                                                                                                                                                                                                                                                                       | 74 (mostly European region 48) | 78 (mostly European region 48)                                                                                                        |
| Number of countries with age reported                 | 119                            | 131    | 81                                                                                                                                                                                                                                                                                        | 36                             | 45                                                                                                                                    |
| Countries with no data                                |                                |        | † Kuwait, Bahamas, Bahrain, United Arab Emirates, Lesotho, South Sudan, Nicaragua, Cabo Verde, Colombia, China, Guatemala, Cuba, North Macedonia, Saint Kitts and Nevis, Dominican Republic, Dominica, Namibia, El Salvador, Venezuela, Grenada, Saint Vincent and the Grenadines, Panama | Somalia, Vietnam.              | Cuba, Micronesia (Federated States of), North Macedonia, Saint Kitts and Nevis, Somalia, Uruguay, Venezuela (Bolivarian Republic of). |

For all occupations but midwives the maximum number of countries reporting is 194, for midwives it is 144 as 50 countries reported within the count of nursing personnel.

\* At least one data point reported for the period 2016-2020

† Excluding 50 countries for which the number of midwives are included in the count of nursing personnel

**Appendix 2. Contribution of other occupations to the overall stock of health workers****Table A2 – The estimated share of other occupations among 82 countries reporting stock statistics for at least 15 occupations\*.**

| WHO region                   | Number of countries | Median | Average | Min | Max |
|------------------------------|---------------------|--------|---------|-----|-----|
| African region               | 34                  | 45%    | 45%     | 9%  | 80% |
| Region of the Americas       | 10                  | 27%    | 27%     | 9%  | 51% |
| Eastern Mediterranean region | 10                  | 43%    | 40%     | 16% | 58% |
| European region              | 8                   | 19%    | 24%     | 7%  | 65% |
| South-East Asia region       | 10                  | 49%    | 47%     | 23% | 67% |
| Western Pacific region       | 10                  | 27%    | 29%     | 11% | 47% |
| Total                        | 82                  | 36%    | 39%     | 7%  | 80% |

\* At least dentists, medical doctors, midwifery personnel, nursing personnel, pharmacists and ten other occupations

**Table A3 – Relative contribution of medical doctors, nursing personnel, midwifery personnel, dentists, pharmacists, and other occupations among 82 countries reporting stock data for at least 15 occupations\*.**

| WHO region                   | Median % of dentists | Median % of medical doctors | Median % of midwifery personnel | Median % of nursing personnel | Median % of pharmacists | Median % of other occupations |
|------------------------------|----------------------|-----------------------------|---------------------------------|-------------------------------|-------------------------|-------------------------------|
| African region               | 0.3%                 | 5.9%                        | 5.8%                            | 36%                           | 0.9%                    | 45%                           |
| Region of the Americas       | 3.0%                 | 25%                         | 0.05%                           | 38%                           | 2.6%                    | 27%                           |
| Eastern Mediterranean region | 3.4%                 | 16%                         | 2.9%                            | 35%                           | 4.3%                    | 43%                           |
| European region              | 5.5%                 | 28%                         | 1.5%                            | 37%                           | 2.7%                    | 19%                           |
| South-East Asia region       | 1.5%                 | 11%                         | 2.6%                            | 28%                           | 2.8%                    | 49%                           |
| Western Pacific region       | 1.8%                 | 12%                         | 0.5%                            | 52%                           | 1.7%                    | 27%                           |
| Total                        | 1.5%                 | 12%                         | 2.2%                            | 36%                           | 1.7%                    | 36%                           |

\* At least dentists, medical doctors, midwifery personnel, nursing personnel, pharmacists and ten other occupations

*Note: the row sum of percentages does not necessarily add-up to 100% as the median is computed separately by country as unit of analysis and not weighted by population size.*

**Appendix 3. Distribution of the estimated global health workforce shortage by WHO region in 2013, 2020 and projected shortage in 2030**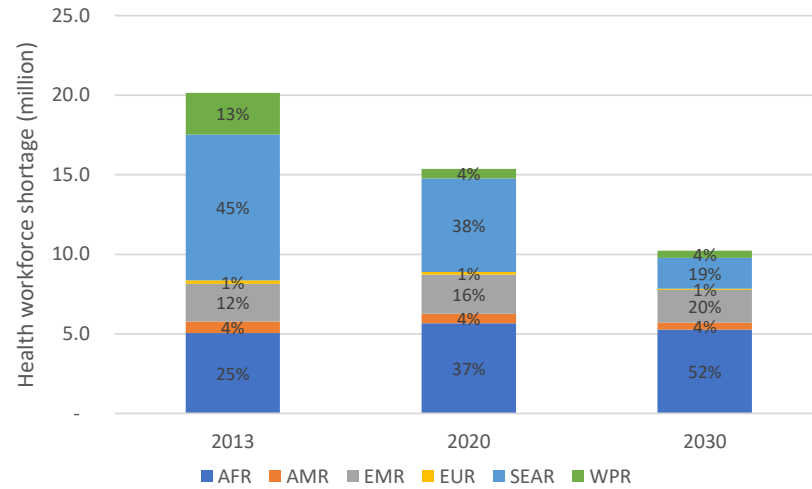

*Note: Relative contribution of each region to shortage is displayed as percentage inside bars.*

**Figure A1. Distribution of the global health workforce shortage by WHO region in 2013, 2020 and projected shortage in 2030**

**Appendix 4. Computation of global shortage with alternative scenario: 1. to maintain densities as in 2020, 2. and alternatively to reach a specific level of essential health services coverage**

***Shortage estimation to maintain densities as of 2020***

As alternative scenario, the main analysis was reproduced with accounting for attrition between 2020 and 2030 to estimate how many health workers should be hired between 2020 and 2030 to maintain the densities of health workers as in 2020. A total of 13.7 million health workers would be required primarily in high income countries (Figure A2).

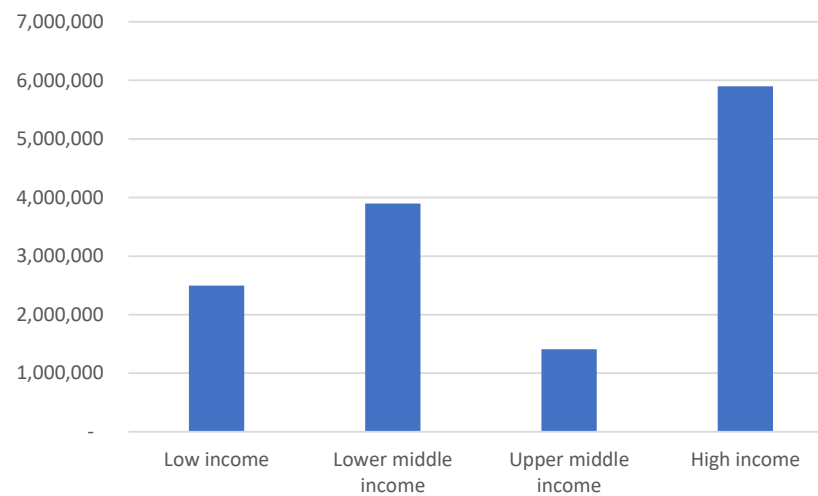

**Figure A2. Number of health workers to hire by income group between 2020 and 2030 to balance the attrition of health workers and to maintain individual country densities as in 2020**

***Alternative shortage estimation to reach service coverage targets***

The global health workforce density in 2013, factoring in the other occupations, were plotted against the Universal Health Coverage Service Coverage Index (UHC SCI) (Figure A3).

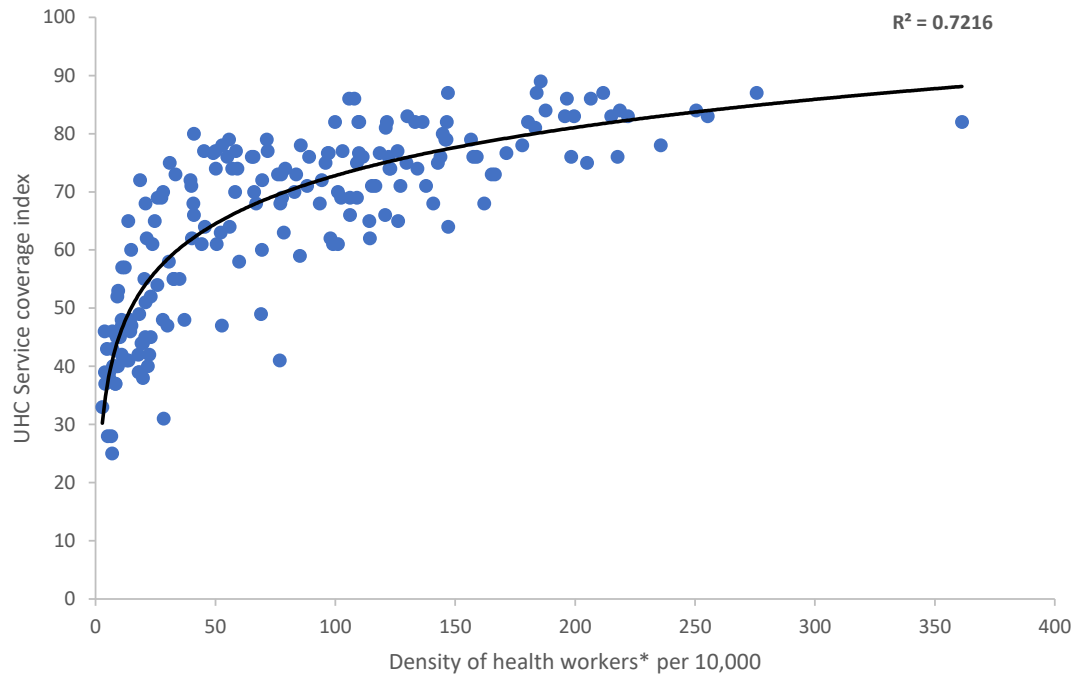

\* includes dentists, medical doctors, midwifery personnel, nursing personnel, pharmacists and other workers estimated by region specific share of other occupations

Note: the black line represents the log-linear correlation between UHC SCI and health workers density, with corresponding  $R^2$  displayed.

**Figure A3 Correlation between global health workforce density per 10,000 population and the Universal Health Coverage Service Coverage Index (UHC SCI) for the year 2013.**

From the equation of this log-linear correlation, thresholds of health workers density were identified for specific UHC SCI levels. The corresponding health workers density for a UHC SCI of 50 was 14.9 per 10,000 population, for UHC SCI of 60 it was 34.6 per 10,000, for UHC SCI of 70 it was 80.2 per 10,000, and for UHC SCI of 80 it was 186.3 per 10,000 population.

These thresholds were then compared to the density of health workers in each country for years 2013, 2020 and for the projected densities in 2030. And the difference provided the estimated shortage as the number of health workers required to attain the UHC SCI level as per the correlation identified above (Table A4).

**Table A4 – Estimation of the global health workforce shortage (in million) to reach Universal Health Coverage Service Coverage Index of 50, 60, 70, 80, for the years 2013, 2020 and for the projected stock of health workers to 2030.**

| Year | UHC SCI<br>Threshold of 50 | UHC SCI<br>Threshold of 60 | UHC SCI<br>Threshold of 70 | UHC SCI<br>Threshold of 80 |
|------|----------------------------|----------------------------|----------------------------|----------------------------|
| 2013 | 0.50                       | 3.35                       | 22.99                      | 85.07                      |

---

|       |      |      |       |       |
|-------|------|------|-------|-------|
| 2020  | 0.28 | 2.44 | 16.02 | 83.40 |
| 2030* | 0.22 | 2.10 | 12.48 | 78.10 |

---

\* Based on the stock of health workers projected to 2030 from a simple stock and flow model that uses for each occupational group the stock in 2020, the expected number of workers retiring from the age distribution of health workers and the number of graduates.

The scenario with a UHC SCI threshold value of 70 produced global shortage estimation for years 2013, 2020 and 2030 (23 million, 16 million, 12 million, respectively) of the same order of magnitude and same decreasing trend as those computed in the main analysis (20 million, 15 million, 10 million respectively). This was expected as the median UHC SCI was 69.5, hence corresponding to the median value of the densities of health workers globally in 2013. Compared to the main analysis, this method was based on a single UHC SCI threshold value and did not factor in occupation specific distribution which explains why results slightly vary.

These analyses relied on UHC SCI as an external benchmark for health outcome, but other metrics could have been used such as childhood mortality, burden of disease, etc.

It is important to also mention that the analysis based on UHC SCI with threshold of densities for health workforce does not account for other important health system inputs such as financing, medicine, infrastructure, amongst others... Therefore, the interpretation of the potential impact of the estimated health workforce shortage on essential health service coverage is to be interpreted with caution.

**Appendix 5. Latest year of data reported by country for five health workers occupations**

| <b>Country</b>           | <b>Dentists</b> | <b>Medical doctors</b> | <b>Midwifery personnel*</b> | <b>Nursing personnel</b> | <b>Pharmacists</b> |
|--------------------------|-----------------|------------------------|-----------------------------|--------------------------|--------------------|
| Afghanistan              | 2019            | 2020                   | 2018                        | 2018                     | 2018               |
| Albania                  | 2018            | 2020                   | 2020                        | 2020                     | 2018               |
| Algeria                  | 2018            | 2018                   | 2018                        | 2018                     | 2018               |
| Andorra                  | 2015            | 2015                   | 2015                        | 2015                     | 2015               |
| Angola                   | 2018            | 2018                   | .                           | 2018                     | 2018               |
| Antigua and Barbuda      | 2014            | 2017                   | 2019                        | 2019                     | 2007               |
| Argentina                | 2018            | 2020                   | .                           | 2017                     | 2004               |
| Armenia                  | 2017            | 2017                   | 2017                        | 2015                     | 2015               |
| Australia                | 2019            | 2020                   | 2019                        | 2019                     | 2019               |
| Austria                  | 2020            | 2020                   | 2020                        | 2019                     | 2020               |
| Azerbaijan               | 2014            | 2019                   | 2014                        | 2014                     | 2014               |
| Bahamas                  | 2017            | 2017                   | .                           | 2018                     | 2011               |
| Bahrain                  | 2015            | 2015                   | .                           | 2015                     | 2015               |
| Bangladesh               | 2020            | 2020                   | 2020                        | 2020                     | 2018               |
| Barbados                 | 2017            | 2017                   | 2019                        | 2018                     | 2005               |
| Belarus                  | 2018            | 2019                   | 2015                        | 2015                     | 2015               |
| Belgium                  | 2020            | 2020                   | 2020                        | 2020                     | 2020               |
| Belize                   | 2019            | 2018                   | .                           | 2018                     | 2017               |
| Benin                    | 2018            | 2019                   | 2019                        | 2019                     | 2018               |
| Bhutan                   | 2020            | 2020                   | .                           | 2020                     | 2020               |
| Bolivia                  | 2017            | 2017                   | .                           | 2017                     | 2016               |
| Bosnia and Herzegovina   | 2015            | 2015                   | .                           | 2018                     | 2015               |
| Botswana                 | 2019            | 2018                   | 2018                        | 2018                     | 2018               |
| Brazil                   | 2018            | 2019                   | .                           | 2019                     | 2017               |
| Brunei Darussalam        | 2019            | 2017                   | .                           | 2018                     | 2015               |
| Bulgaria                 | 2019            | 2018                   | 2018                        | 2018                     | 2015               |
| Burkina Faso             | 2019            | 2020                   | 2019                        | 2019                     | 2019               |
| Burundi                  | 2018            | 2020                   | .                           | 2020                     | 2018               |
| Cambodia                 | 2018            | 2014                   | 2019                        | 2019                     | 2014               |
| Cameroon                 | 2020            | 2020                   | 2020                        | 2020                     | 2020               |
| Canada                   | 2019            | 2019                   | .                           | 2020                     | 2020               |
| Cape Verde               | 2019            | 2018                   | .                           | 2018                     | 2018               |
| Central African Republic | 2018            | 2018                   | .                           | 2018                     | 2018               |
| Chad                     | 2018            | 2020                   | 2020                        | 2020                     | 2020               |
| Chile                    | 2020            | 2020                   | 2020                        | 2020                     | 2020               |
| China                    | 2017            | 2019                   | .                           | 2019                     | 2017               |
| Colombia                 | 2020            | 2020                   | .                           | 2020                     | 2020               |
| Comoros                  | 2018            | 2018                   | .                           | 2018                     | 2018               |
| Congo                    | 2018            | 2018                   | .                           | 2018                     | 2018               |
| Cook Islands             | 2019            | 2014                   | 2019                        | 2019                     | 2014               |
| Costa Rica               | 2020            | 2020                   | .                           | 2020                     | 2020               |



|                                          |      |      |      |      |      |
|------------------------------------------|------|------|------|------|------|
| Cote d'Ivoire                            | 2019 | 2019 | 2019 | 2019 | 2019 |
| Croatia                                  | 2019 | 2019 | .    | 2016 | 2015 |
| Cuba                                     | 2018 | 2018 | .    | 2018 | .    |
| Cyprus                                   | 2018 | 2019 | 2019 | 2016 | 2015 |
| Czech Republic                           | 2019 | 2020 | 2019 | 2019 | 2019 |
| Democratic People's<br>Republic of Korea | 2017 | 2017 | 2017 | 2017 | 2017 |
| Democratic Republic of the<br>Congo      | 2018 | 2018 | .    | 2018 | 2018 |
| Denmark                                  | 2018 | 2018 | 2018 | 2018 | 2018 |
| Djibouti                                 | 2014 | 2014 | 2014 | 2014 | 2014 |
| Dominica                                 | 2018 | 2018 | .    | 2017 | 2001 |
| Dominican Republic                       | 2019 | 2019 | .    | 2019 | 2019 |
| Ecuador                                  | 2017 | 2017 | .    | 2018 | 2015 |
| Egypt                                    | 2018 | 2019 | .    | 2018 | 2018 |
| El Salvador                              | 2018 | 2018 | .    | 2018 | 2017 |
| Equatorial Guinea                        | 2004 | 2017 | .    | 2018 | 2018 |
| Eritrea                                  | 2018 | 2020 | .    | 2018 | 2018 |
| Estonia                                  | 2019 | 2019 | 2019 | 2019 | 2019 |
| Eswatini                                 | 2020 | 2020 | .    | 2020 | 2020 |
| Ethiopia                                 | 2020 | 2020 | 2020 | 2020 | 2020 |
| Fiji                                     | 2019 | 2015 | 2019 | 2019 | 2015 |
| Finland                                  | 2018 | 2018 | 2018 | 2018 | 2018 |
| France                                   | 2019 | 2019 | 2019 | 2019 | 2019 |
| Gabon                                    | 2019 | 2020 | 2019 | 2019 | 2019 |
| Gambia                                   | 2020 | 2020 | 2020 | 2020 | 2020 |
| Georgia                                  | 2020 | 2020 | .    | 2020 | 2019 |
| Germany                                  | 2019 | 2020 | 2019 | 2019 | 2019 |
| Ghana                                    | 2018 | 2020 | 2020 | 2020 | 2020 |
| Greece                                   | 2019 | 2019 | 2019 | 2019 | 2019 |
| Grenada                                  | 2018 | 2018 | .    | 2018 | 2016 |
| Guatemala                                | 2020 | 2020 | .    | 2020 | 2020 |
| Guinea                                   | 2018 | 2018 | .    | 2018 | 2018 |
| Guinea-Bissau                            | 2020 | 2020 | 2020 | 2020 | 2020 |
| Guyana                                   | 2020 | 2020 | 2020 | 2020 | 2020 |
| Haiti                                    | 2018 | 2018 | 2018 | 2018 | 2018 |
| Honduras                                 | 2017 | 2020 | 2019 | 2018 | 2000 |
| Hungary                                  | 2019 | 2020 | 2019 | 2019 | 2019 |
| Iceland                                  | 2020 | 2019 | .    | 2020 | 2020 |
| India                                    | 2020 | 2020 | .    | 2020 | 2020 |
| Indonesia                                | 2020 | 2020 | 2020 | 2020 | 2020 |
| Iran, Islamic Republic of                | 2018 | 2018 | 2018 | 2018 | 2018 |
| Iraq                                     | 2020 | 2020 | 2020 | 2020 | 2020 |
| Ireland                                  | 2020 | 2020 | 2019 | 2019 | 2020 |

|                                  |      |      |      |      |      |
|----------------------------------|------|------|------|------|------|
| Israel                           | 2020 | 2020 | 2020 | 2020 | 2020 |
| Italy                            | 2020 | 2020 | 2020 | 2020 | 2020 |
| Jamaica                          | 2017 | 2018 | 2018 | 2018 | 2018 |
| Japan                            | 2018 | 2018 | 2018 | 2018 | 2018 |
| Jordan                           | 2019 | 2019 | 2019 | 2019 | 2019 |
| Kazakhstan                       | 2015 | 2020 | 2015 | 2015 | 2015 |
| Kenya                            | 2019 | 2018 | .    | 2018 | 2018 |
| Kiribati                         | 2016 | 2013 | .    | 2018 | 2016 |
| Kuwait                           | 2015 | 2020 | .    | 2020 | 2014 |
| Kyrgyzstan                       | 2018 | 2014 | 2019 | 2019 | 2014 |
| Lao People's Democratic Republic | 2020 | 2020 | 2020 | 2020 | 2020 |
| Latvia                           | 2020 | 2020 | 2020 | 2020 | 2020 |
| Lebanon                          | 2018 | 2019 | 2018 | 2018 | 2018 |
| Lesotho                          | 2019 | 2018 | .    | 2018 | 2018 |
| Liberia                          | 2019 | 2018 | .    | 2018 | 2018 |
| Libyan Arab Jamahiriya           | 2017 | 2017 | 2017 | 2017 | 2017 |
| Lithuania                        | 2020 | 2020 | 2020 | 2020 | 2020 |
| Luxembourg                       | 2017 | 2017 | 2017 | 2017 | 2017 |
| Madagascar                       | 2018 | 2018 | 2018 | 2018 | 2018 |
| Malawi                           | 2020 | 2020 | .    | 2020 | 2020 |
| Malaysia                         | 2018 | 2020 | .    | 2019 | 2015 |
| Maldives                         | 2020 | 2020 | .    | 2020 | 2020 |
| Mali                             | 2018 | 2018 | 2018 | 2018 | 2018 |
| Malta                            | 2019 | 2015 | 2018 | 2018 | 2015 |
| Marshall Islands                 | 2019 | 2012 | .    | 2018 | 2012 |
| Mauritania                       | 2019 | 2018 | 2018 | 2018 | 2018 |
| Mauritius                        | 2019 | 2020 | .    | 2018 | 2018 |
| Mexico                           | 2019 | 2019 | 2019 | 2019 | 2010 |
| Micronesia, Federated States of  | 2008 | 2020 | 2019 | 2019 | .    |
| Monaco                           | 2014 | 2014 | 2014 | 2014 | 2014 |
| Mongolia                         | 2018 | 2018 | 2019 | 2018 | 2018 |
| Montenegro                       | 2020 | 2020 | 2020 | 2020 | 2020 |
| Morocco                          | 2017 | 2017 | 2017 | 2017 | 2017 |
| Mozambique                       | 2020 | 2020 | 2020 | 2020 | 2020 |
| Myanmar                          | 2019 | 2019 | 2019 | 2019 | 2019 |
| Namibia                          | 2018 | 2018 | .    | 2018 | 2018 |
| Nauru                            | 2019 | 2015 | .    | 2018 | 2015 |
| Nepal                            | 2020 | 2020 | 2020 | 2020 | 2020 |
| Netherlands                      | 2019 | 2020 | .    | 2020 | 2019 |
| New Zealand                      | 2019 | 2020 | 2020 | 2020 | 2020 |
| Nicaragua                        | 2018 | 2018 | .    | 2017 | 2014 |
| Niger                            | 2018 | 2020 | 2018 | 2018 | 2018 |

|                                  |      |      |      |      |      |
|----------------------------------|------|------|------|------|------|
| Nigeria                          | 2019 | 2018 | 2019 | 2019 | 2019 |
| Niue                             | 2008 | 2008 | .    | 2018 | 2008 |
| Norway                           | 2020 | 2020 | 2020 | 2020 | 2020 |
| Oman                             | 2020 | 2020 | 2020 | 2020 | 2020 |
| Pakistan                         | 2019 | 2019 | 2019 | 2019 | 2019 |
| Palau                            | 2020 | 2020 | 2020 | 2020 | 2020 |
| Panama                           | 2019 | 2019 | .    | 2019 | 2019 |
| Papua New Guinea                 | 2019 | 2019 | .    | 2019 | 2018 |
| Paraguay                         | 2018 | 2020 | 2019 | 2018 | 2018 |
| Peru                             | 2018 | 2018 | 2019 | 2018 | 2018 |
| Philippines                      | 2019 | 2020 | 2019 | 2019 | 2017 |
| Poland                           | 2020 | 2020 | 2020 | 2020 | 2020 |
| Portugal                         | 2018 | 2019 | 2019 | 2019 | 2019 |
| Qatar                            | 2019 | 2018 | 2018 | 2018 | 2018 |
| Republic of Korea                | 2019 | 2019 | 2019 | 2019 | 2019 |
| Republic of Moldova              | 2020 | 2020 | 2020 | 2020 | 2020 |
| Romania                          | 2017 | 2017 | 2017 | 2017 | 2017 |
| Russian Federation               | 2020 | 2020 | 2020 | 2020 | 2020 |
| Rwanda                           | 2018 | 2019 | 2019 | 2019 | 2018 |
| Saint Kitts and Nevis            | 2018 | 2018 | .    | 2015 | .    |
| Saint Lucia                      | 2017 | 2017 | 2017 | 2017 | 2017 |
| Saint Vincent and the Grenadines | 2012 | 2012 | .    | 2018 | 2004 |
| Samoa                            | 2020 | 2020 | 2020 | 2020 | 2020 |
| San Marino                       | 2018 | 2014 | 2014 | 2014 | 2014 |
| Sao Tome and Principe            | 2019 | 2019 | 2019 | 2019 | 2019 |
| Saudi Arabia                     | 2020 | 2020 | 2019 | 2019 | 2018 |
| Senegal                          | 2019 | 2019 | 2019 | 2019 | 2019 |
| Serbia                           | 2015 | 2016 | .    | 2016 | 2016 |
| Seychelles                       | 2019 | 2019 | .    | 2018 | 2018 |
| Sierra Leone                     | 2018 | 2018 | 2019 | 2018 | 2018 |
| Singapore                        | 2018 | 2019 | .    | 2017 | 2016 |
| Slovakia                         | 2019 | 2019 | 2019 | 2019 | 2019 |
| Slovenia                         | 2019 | 2019 | 2019 | 2019 | 2019 |
| Solomon Islands                  | 2019 | 2016 | .    | 2018 | 2016 |
| Somalia                          | .    | 2014 | 2014 | 2014 | .    |
| South Africa                     | 2019 | 2019 | .    | 2018 | 2016 |
| South Sudan                      | 2018 | 2018 | .    | 2018 | 2018 |
| Spain                            | 2019 | 2019 | 2019 | 2019 | 2019 |
| Sri Lanka                        | 2020 | 2020 | 2020 | 2020 | 2020 |
| Sudan                            | 2015 | 2017 | .    | 2018 | 2017 |
| Suriname                         | 2019 | 2018 | 2019 | 2019 | 2019 |
| Sweden                           | 2018 | 2019 | 2019 | 2018 | 2019 |
| Switzerland                      | 2019 | 2020 | 2019 | 2019 | 2019 |

|                                           |      |      |      |      |      |
|-------------------------------------------|------|------|------|------|------|
| Syrian Arab Republic                      | 2016 | 2016 | .    | 2016 | 2016 |
| Tajikistan                                | 2014 | 2014 | 2014 | 2014 | 2003 |
| Thailand                                  | 2019 | 2020 | .    | 2019 | 2019 |
| The former Yugoslav Republic of Macedonia | 2015 | 2015 | .    | 2015 | .    |
| Timor-Leste                               | 2020 | 2020 | 2020 | 2020 | 2020 |
| Togo                                      | 2018 | 2020 | 2020 | 2020 | 2020 |
| Tonga                                     | 2020 | 2020 | 2020 | 2020 | 2020 |
| Trinidad and Tobago                       | 2019 | 2019 | 2019 | 2019 | 2018 |
| Tunisia                                   | 2016 | 2017 | .    | 2017 | 2017 |
| Turkey                                    | 2019 | 2019 | 2019 | 2019 | 2019 |
| Turkmenistan                              | 2014 | 2014 | 2014 | 2014 | 2014 |
| Tuvalu                                    | 2020 | 2020 | .    | 2020 | 2020 |
| Uganda                                    | 2020 | 2020 | 2020 | 2020 | 2020 |
| Ukraine                                   | 2014 | 2014 | 2014 | 2014 | 2014 |
| United Arab Emirates                      | 2019 | 2019 | .    | 2019 | 2019 |
| United Kingdom                            | 2020 | 2020 | 2020 | 2020 | 2020 |
| United Republic of Tanzania               | 2018 | 2018 | .    | 2018 | 2018 |
| United States of America                  | 2018 | 2018 | .    | 2018 | 2010 |
| Uruguay                                   | 2017 | 2017 | 2019 | 2019 | .    |
| Uzbekistan                                | 2014 | 2014 | 2014 | 2014 | 2014 |
| Vanuatu                                   | 2019 | 2016 | 2019 | 2019 | 2012 |
| Venezuela, Bolivarian Republic of         | 2017 | 2017 | .    | 2018 | .    |
| Viet Nam                                  | .    | 2016 | 2016 | 2016 | 2016 |
| Yemen                                     | 2014 | 2014 | .    | 2018 | 2014 |
| Zambia                                    | 2018 | 2018 | 2018 | 2018 | 2018 |
| Zimbabwe                                  | 2020 | 2020 | 2020 | 2020 | 2020 |

*\*In many countries, nurses trained with midwifery skills are counted and reported as nurses which makes the distinction between nursing personnel and midwifery personnel difficult to draw.*
